# Supplementary material for: The influence of racism on cigarette smoking: Longitudinal study of young people in a British multiethnic cohort
Source: PLOS journal article supplement (doi:10.1371/journal.pone.0190496), 2018-01-24
Supplement: S2 (10.1371/journal.pone.0190496.s002) [file journal.pone.0190496.s002]

## **Appendix 1: Qualitative interviews topic guide**

### **1. Socio-economic circumstances:**

#### 1.1 Educational history and qualifications

#### 1.2 Employment/study

- Nature of employment/study
- Working hours and conditions - permanent/temporary; full-time/part-time; salaried or hourly rate
- Satisfaction with work/study
- Experience of finding work, prior unemployment
- Areas of difficulty/success
- Relationships with students/workmates
- Experiences of discrimination
- How far work/study matches with childhood aspirations
- Influence on occupational choices – parents, family, friends, school, culture
- Future plans

#### 1.3 Other regular activity – hobbies, voluntary work

#### 1.4 Housing

- Tenure, cost, contribution to rent
- How long he/she has lived in property
- Number of people living in the same accommodation and relationship (family, friends, co-tenants)
- Condition of the property (participant report/researcher's observation)
- How many rooms, own room
- Likes and dislikes about accommodation – cost, overcrowding

#### 1.5 Finances

- Sources of income – salary, student loan, benefits, support from family
- Financial difficulties, e.g. debt
- Contribution to household budget

## **2. Health**

### 2.1 General health

- How the participant feels health is generally
- Check for previous or current conditions
- In receipt of treatment – NHS and/or other

### 2.2 Mental health

- How the participant feels mental health is generally

- Check for previous or current conditions
- In receipt of treatment – NHS and/or other

## 2.3 Explore any particular stresses the participant is facing in life

- e.g.* work, relationships, money, discrimination
- Elicit an example if possible.

## 2.4 Explore opportunities/challenges in transition from teens to adulthood and feelings about these.

- Responsibilities, decision-making
- Finances
- Changes in relationships – family/friends/colleagues/romantic
- Areas of stress or conflict

## 2.5 Explore what helps the participant to cope with difficulties/changes in life.

- e.g.* friends, family, religion
- If possible, elicit an example of when the person faced a problem and how they responded.

# 3. Identity and discrimination

## 3.1 Ethnic identity

- How the participant defines ethnicity – to self/others
- How strongly he/she identifies with ethnicity - visits to ‘home’ country, use of another language, food, music, clothing, membership of any ethnically affiliated organisations
- Experiences of racism/discrimination – media, society, community, school, workplace

## 3.2 Religion

- How participant defines his/her religious affiliation
- Nature and frequency of attendance at place of worship and religious practice
- Importance of belief/religious identity
- Experiences of discrimination - media, society, community, school, workplace

## 3.3 Gender

- Gender identity
- Social/cultural expectations of role
- Experiences of discrimination - media, society, community, school, workplace

# 4. Relationships

## 4.1 Family relationships

- amount of contact
- level of support
- helpful/unhelpful aspects of family relationships
- areas of agreement and conflict

84  
85  
86  
87  
88  
89  
90  
91  
92  
93  
94  
95  
96  
97  
98  
99  
100  
101  
102  
103  
104  
105  
106  
107  
108

4.2 Friendships

- amount of contact
- level of support
- mainly from own or other ethnic groups
- areas of agreement and conflict

4.3 Romantic relationships

- how long together
- amount of contact
- level of support
- from own or other ethnic group
- areas of agreement and conflict

**5. Neighbourhood environment**

- feelings about neighbourhood e.g. sense of community/belonging, crime/safety, expense
- relationships with neighbours
- use of community resources

**6. Political and economic situation**

- impact of government policy on participant, changes to student finances/benefits
- impact of economic downturn
- government policy/societal attitudes towards ethnic minorities/immigration
